# Supplementary material for: Knowledge needs, available practices, and future challenges in agricultural soils
Source: Copernicus journal article supplement (doi:10.5194/soil-2-511-2016), 2016-10-10
Supplement: Supplementary file 1 [file soil-2-511-2016-supplement.pdf]

Supplement of SOIL, 2, 511–521, 2016  
<http://www.soil-journal.net/2/511/2016/>  
doi:10.5194/soil-2-511-2016-supplement  
© Author(s) 2016. CC Attribution 3.0 License.

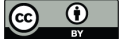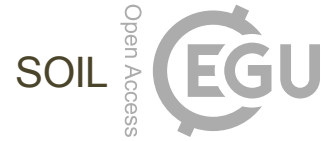

*Supplement of*

## **Knowledge needs, available practices, and future challenges in agricultural soils**

**Georgina Key et al.**

*Correspondence to:* Georgina Key ([georgina.key@ahdb.org.uk](mailto:georgina.key@ahdb.org.uk))

The copyright of individual parts of the supplement might differ from the CC-BY 3.0 licence.

## Supplement

Table 1. Categories of effectiveness (Sutherland et al, 2015).

| Category                                 | Description                                                                                                                                 | General criteria                                                                                                                                                | Thresholds                                                                                                                     |
|------------------------------------------|---------------------------------------------------------------------------------------------------------------------------------------------|-----------------------------------------------------------------------------------------------------------------------------------------------------------------|--------------------------------------------------------------------------------------------------------------------------------|
| Beneficial                               | Effectiveness has been demonstrated by clear evidence. Expectation of harms is small compared with the benefits                             | High median benefit score<br>High median certainty score<br>Low median harm score                                                                               | Effectiveness: >60%<br>Certainty: >60%<br>Harm: <20%                                                                           |
| Likely to be beneficial                  | Effectiveness is less well established than for those listed under 'effective' <b>OR</b> There is clear evidence of medium effectiveness    | High benefit score<br>Lower certainty score<br>Low harm score<br><b>OR</b><br>Medium benefit score<br>High certainty score<br>Low harm score                    | Effectiveness: >60%<br>Certainty: 40-60%<br>Harm: <20%<br><b>OR</b><br>Effectiveness: 40-60%<br>Certainty: ≥40%<br>Harm: < 20% |
| Trade-off between benefit and harms      | Interventions for which practitioners must weigh up the beneficial and harmful effects according to individual circumstances and priorities | Medium benefit and medium harm scores<br><b>OR</b><br>High benefit and high harm scores<br>High certainty score                                                 | Effectiveness: ≥40%<br>Certainty: ≥40%<br>Harm: ≥20%                                                                           |
| Unknown effectiveness (limited evidence) | Currently insufficient data, or data of inadequate quality                                                                                  | Low certainty score                                                                                                                                             | Effectiveness: Any<br>Certainty: <40%<br>Harm: Any                                                                             |
| Unlikely to be beneficial                | Lack of effectiveness is less well established than for those listed under 'likely to be ineffective or harmful'                            | Low benefit score<br>Medium certainty score and/or some variation between experts                                                                               | Effectiveness: <40%<br>Certainty: 40-60%<br>Harm: <20%                                                                         |
| Likely to be ineffective or harmful      | Ineffectiveness or harmfulness has been demonstrated by clear evidence                                                                      | Low benefit score<br>High certainty score (regardless of harms)<br><b>OR</b><br>Low benefit score<br>High harm score (regardless of certainty of effectiveness) | Effectiveness: <40%<br>Certainty: >60%<br>Harm: Any<br><b>OR</b><br>Effectiveness: <40%<br>Certainty: ≥40%<br>Harm: ≥20%       |

## Plot data

Figure 01

|                      | Mixed<br>amendments | Cover<br>crop | Crop<br>rotation |
|----------------------|---------------------|---------------|------------------|
| Number of soil types | 5                   | 6             | 8                |
| Number of locations  | 3                   | 7             | 5                |
| Number of studies    | 11                  | 12            | 14               |

R script:

```
read.table(file="barplot.txt",header=T)->coverage
attach(coverage)
names(coverage)
barplot(as.matrix(coverage),beside=T, ylim=c(0,18),xaxt="n",
,ylab="Coverage of evidence (number of papers)", xlab="Actions
beneficial to soil fertility")
axis(1,at=c(2.5,6.5,10.5),labels=c("Mixed amendments","Cover
crops","Crop rotation"))
legend(6.87,18,c("Number of soil types","Number of
locations","Number of studies"),fill=grey.colors(3))
```

Figure 02

| <u>Effectiveness</u> | <u>Certainty</u> | <u>Negative side-effects</u> |
|----------------------|------------------|------------------------------|
| 69                   | 64               | 15                           |
| 75                   | 67               | 16                           |
| 66                   | 75               | 8                            |
| 65                   | 54               | 19                           |
| 64                   | 46               | 19                           |
| 55                   | 62               | 18                           |
| 51                   | 58               | 14                           |
| 61                   | 72               | 46                           |
| 55                   | 52               | 64                           |
| 70                   | 59               | 26                           |
| 60                   | 64               | 23                           |
| 63                   | 54               | 29                           |
| 53                   | 59               | 32                           |
| 45                   | 44               | 54                           |
| 53                   | 53               | 34                           |
| 46                   | 45               | 36                           |
| 49                   | 45               | 20                           |
| 46                   | 38               | 33                           |
| 58                   | 35               | 20                           |
| 50                   | 33               | 24                           |
| 53                   | 36               | 16                           |
| 54                   | 29               | 19                           |
| 35                   | 37               | 23                           |

|    |    |    |
|----|----|----|
| 40 | 31 | 17 |
| 36 | 23 | 19 |
| 14 | 34 | 20 |
| 26 | 40 | 48 |

---

**R script:**

```
read.table(file="added.var.txt",header=T)->coverage
attach(coverage)
names(coverage)
spcor((coverage),method=c("spearman"))
install.packages("car")
library(car)
mod1<-lm(eff~cert+neg,data=mydataframe)
avPlot(mod1,cert,neg,main="",xlab="Certainty | Negative side-
effects",ylab="Effectivness | Negative side-effects",grid=T)
```
